# Supplementary material
Source: PubMed Central journal article supplement (PMC1955792)

# Telomere Recovery

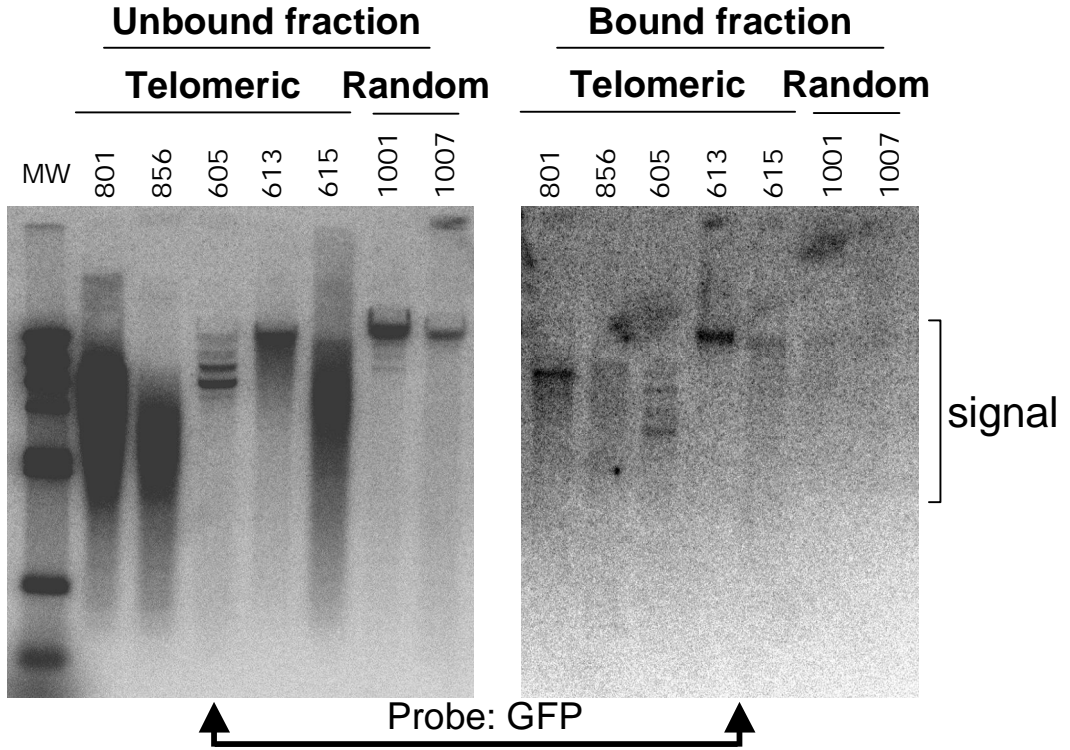

Supplement: pnas_0704999104_1.pdf [file pnas_0704999104_1.pdf]

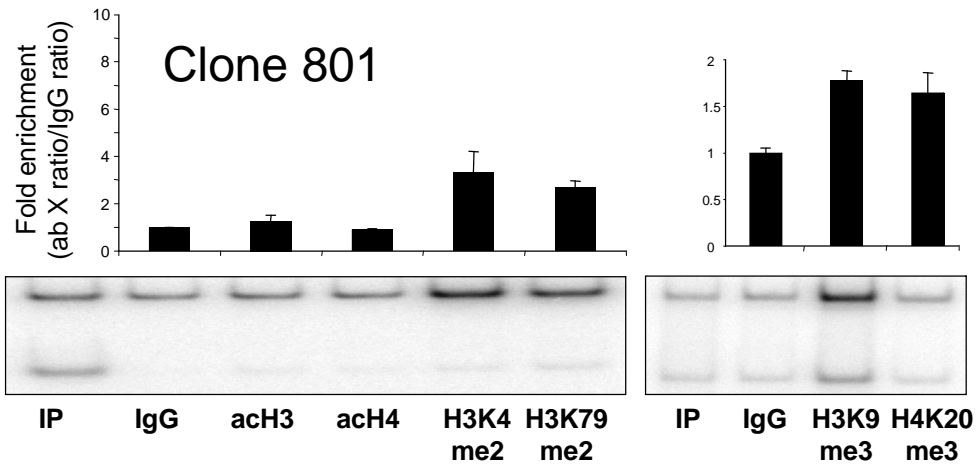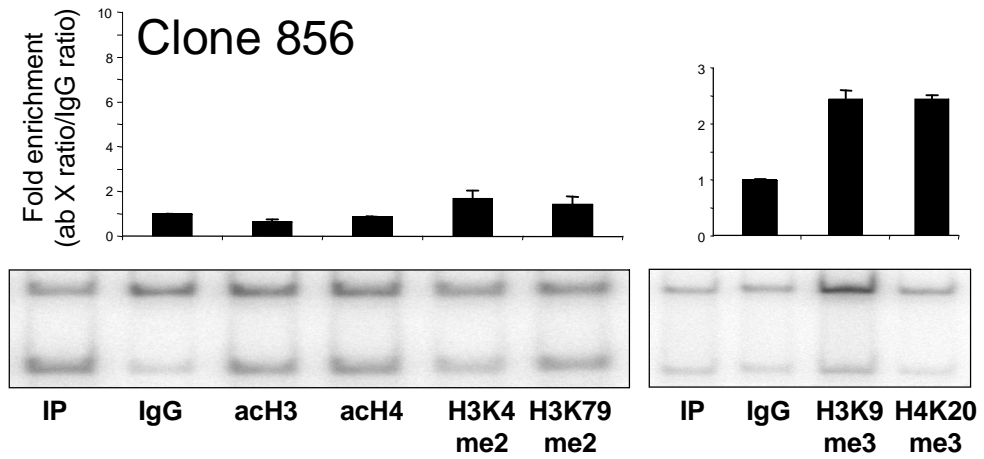

Supplement: pnas_0704999104_2.pdf [file pnas_0704999104_2.pdf]
